# Supplementary material for: HDLs extract lipophilic drugs from cells
Source: PubMed Central journal article supplement (PMC8919334; doi:10.1242/jcs.258644), 2022-01-31
Supplement: joces-135-258644-s1.pdf [file joces-135-258644-s1.pdf]

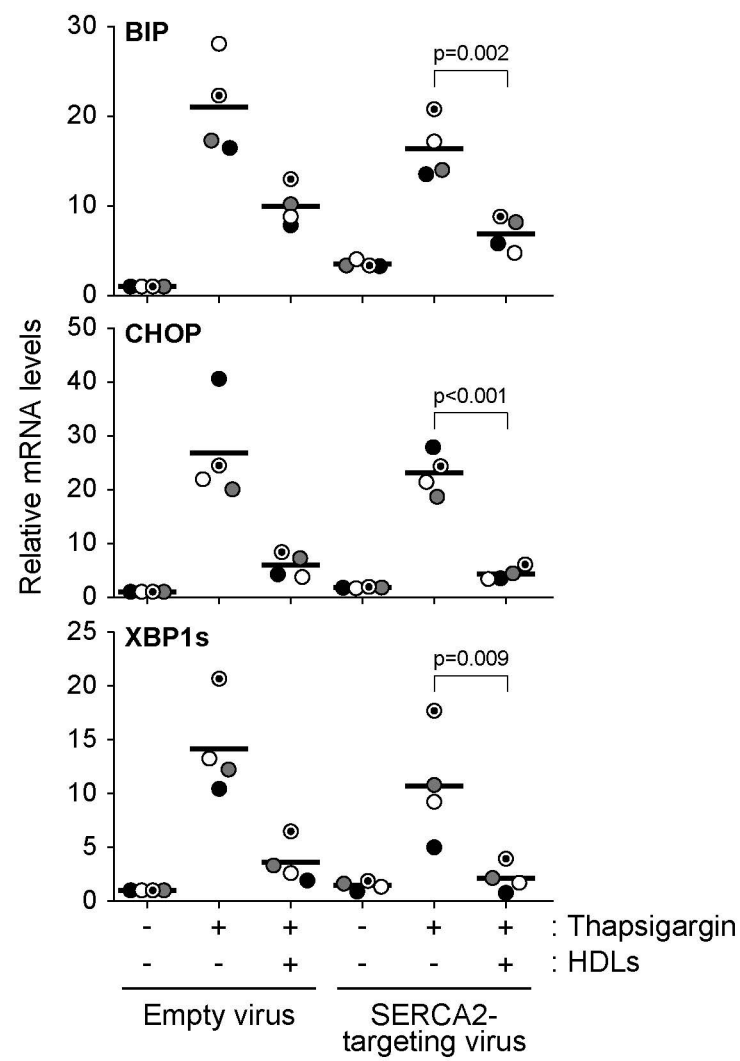

Figure S1

**Fig. S1. The effect of HDLs on TG-induced ER stress in SERCA2 knockdown DLD-1 cells.**

DLD-1 cells that were infected with a control virus or a lentivirus encoding for an shRNA directed against SERCA2 (see Figure 3B) were seeded in 6-well plates (200000 per well). Twenty four hours later, cells were treated or not with TG (15  $\mu$ M) in the presence or in the absence of 1 mM HDL for an additional 24 hour period. The mRNA expression levels of the indicated ER stress markers were measured by RT-PCR.

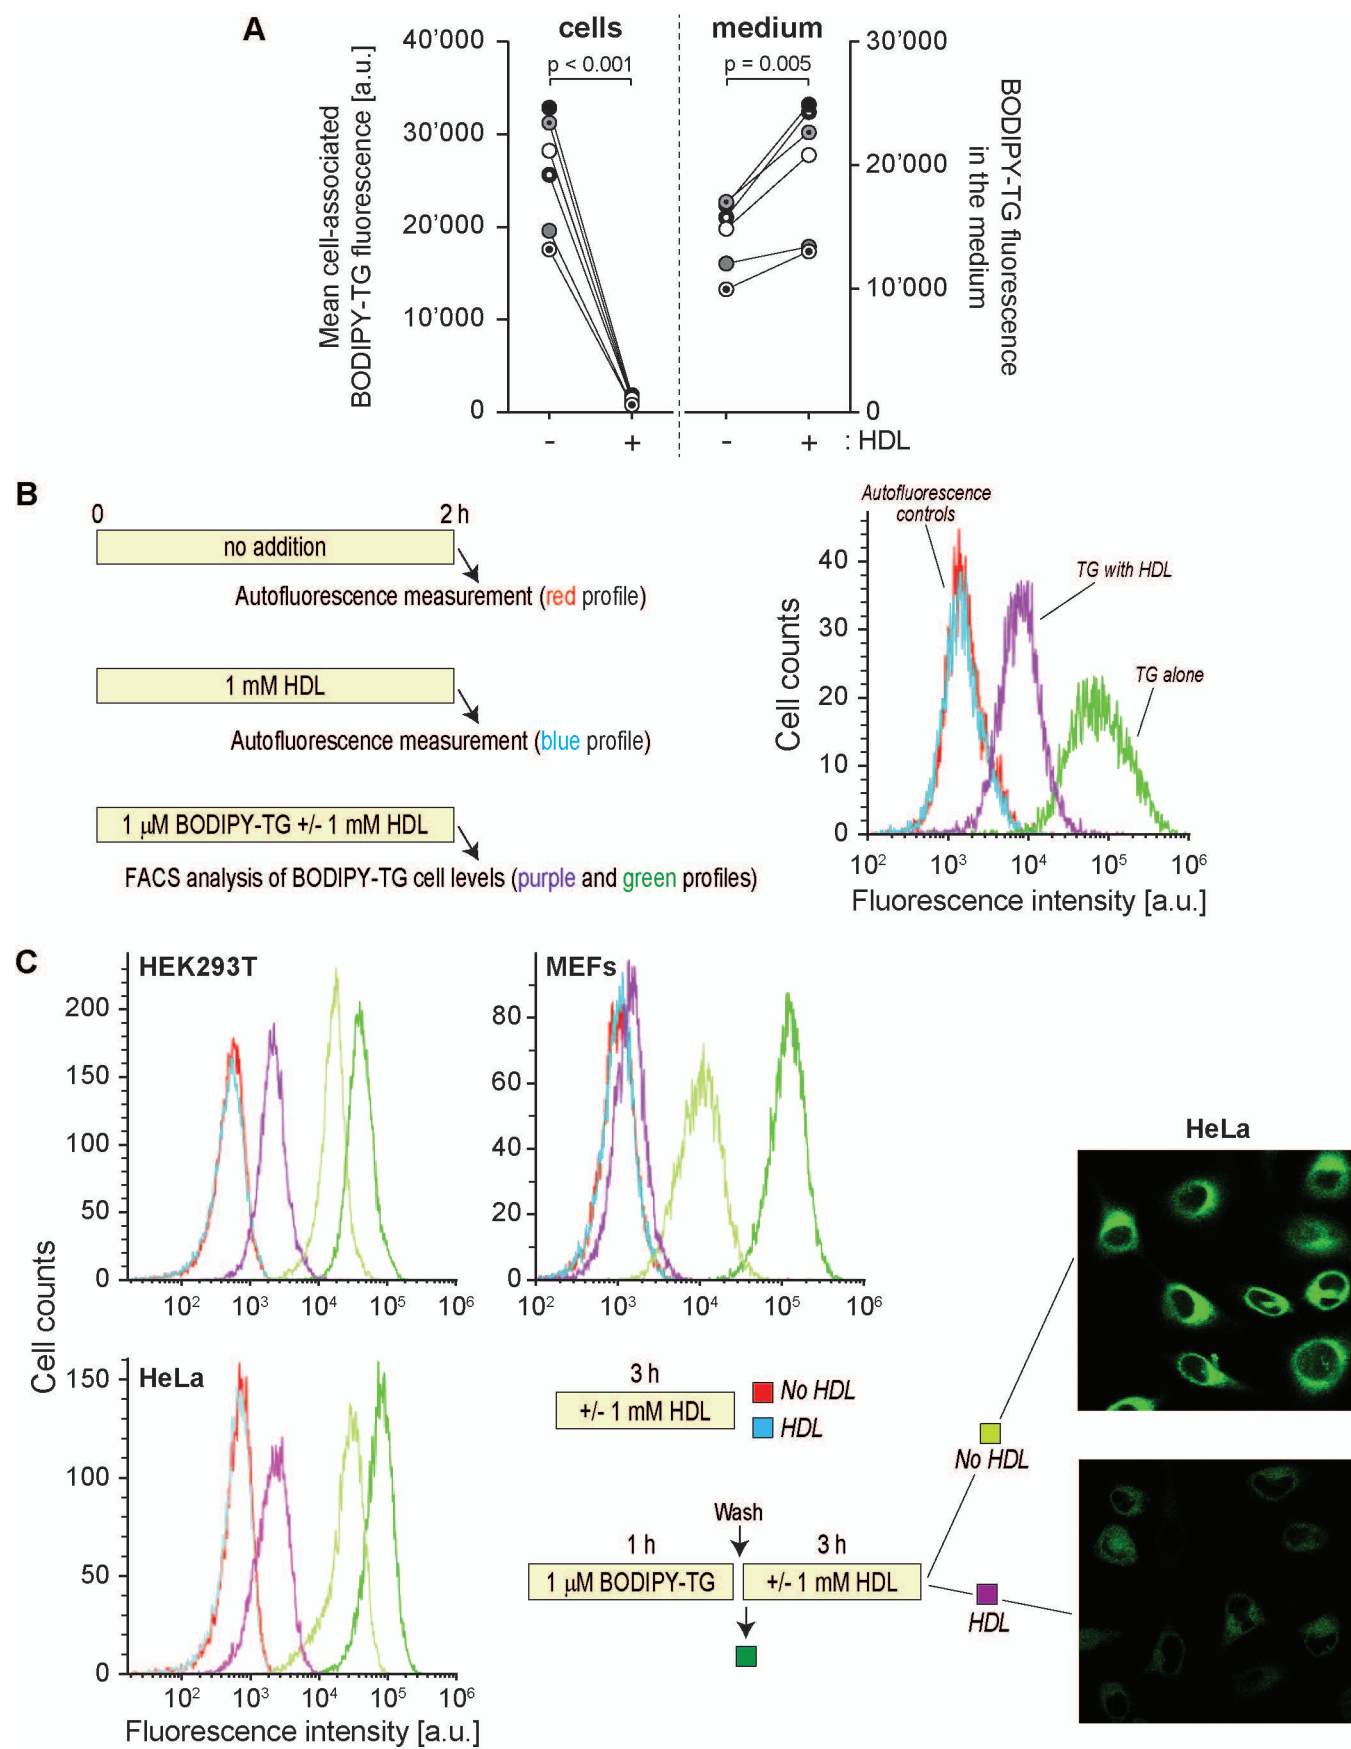

Figure S2

**Fig. S2. HDL-mediated BODIPY-TG extraction**

**A.** HeLa cells (150 000 cells) were plated in 6-well plates. Twenty four hours later, they were treated with 1  $\mu$ M BODIPY-TG for 1 hour, washed once with PBS, and then incubated in the absence or in the presence of 1 mM HDL for another 3 hours. The cell-associated BODIPY-TG levels were assessed by flow cytometry (left hand side graph labelled “cells”) and those in the medium measured using a Cytation 3 cell imaging multi-mode reader (excitation wavelength: 485 nm; emission wavelength: 538 nm) (right hand side graph labelled “medium”). The results are derived from 6 independent experiments (each labelled with a unique symbol). **B.** Min6 cells (300 000 cells per well) were treated with 1  $\mu$ M BODIPY-TG in the presence or in the absence of 1 mM HDL for 2 hours. The cells were then collected and fluorescence intensity was monitored by flow cytometry. The autofluorescence profiles of untreated and HDL-incubated cells are also shown. **C.** Cells were seeded in 6 well plates (150000, 80000, and 200000 per well for HEK293T, MEFs, and HeLa cells, respectively) one day before being treated as described in the scheme. Cells were then analyzed by flow cytometry. The images on the right hand side correspond to confocal imaging of 120000 HeLa cells seeded the previous day in 35 mm glass bottom dishes and treated as shown in the scheme. The recording confocal settings between the two images were identical.

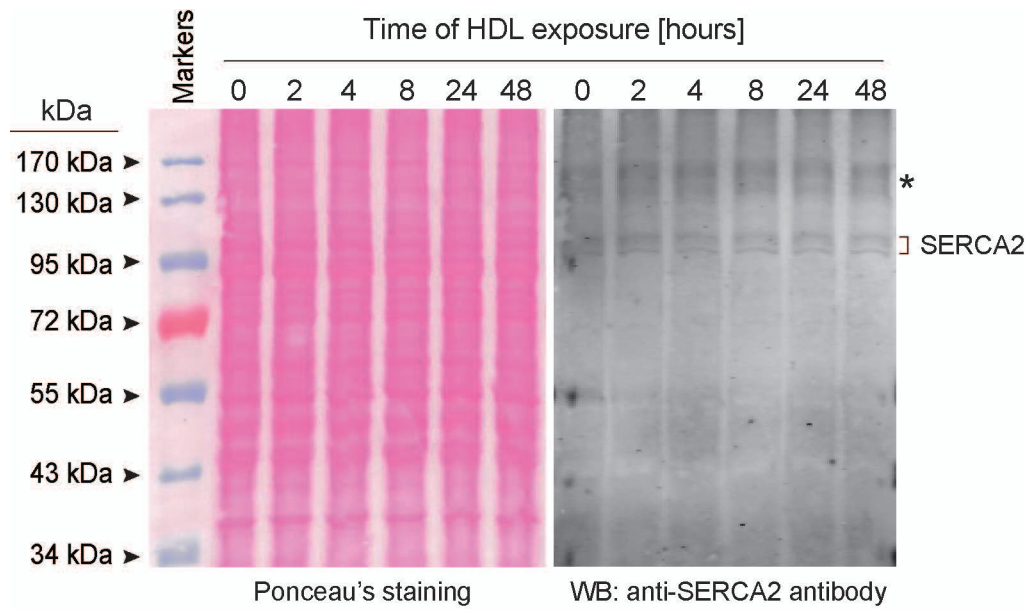

Figure S3

**Fig. S3. HDLs do not modulate SERCA levels.**

DLD1 were seeded in 6-well plates (200000 cells per well except for the “48 hours” condition where 100 000 cells were seeded). Twenty four hours later, they were exposed to 1 mM HDLs for the indicated time periods (time 0 corresponds to no HDL exposure). SERCA2 expression was assessed by western blotting and loading evaluated via Ponceau staining. Asterisk indicates non-specific bands.

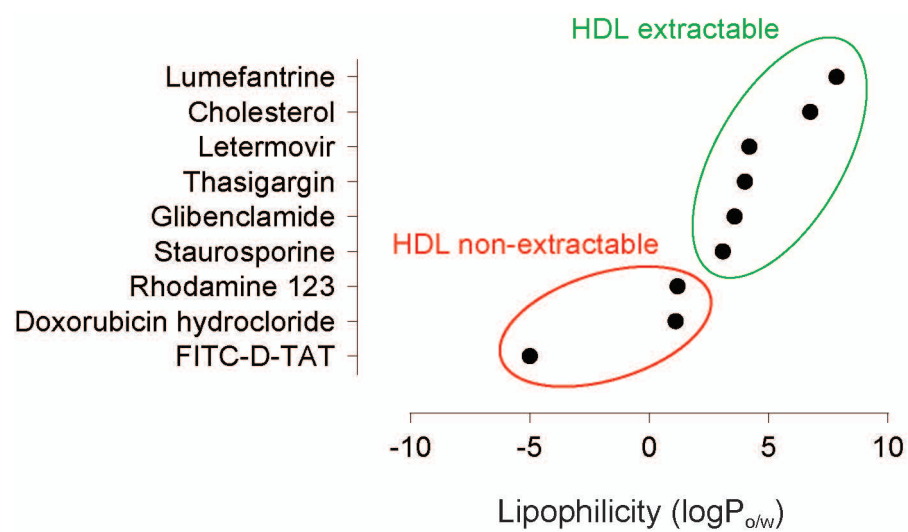

Figure S4

**Fig. S4. Correlation between HDL-mediated efflux efficiency and drug lipophilicity.** The n-octanol/water partition coefficient ( $\log P_{o/w}$ ) of the indicated compounds was obtained through the SwissADME website (<http://www.swissadme.ch>) (Daina et al., 2017).

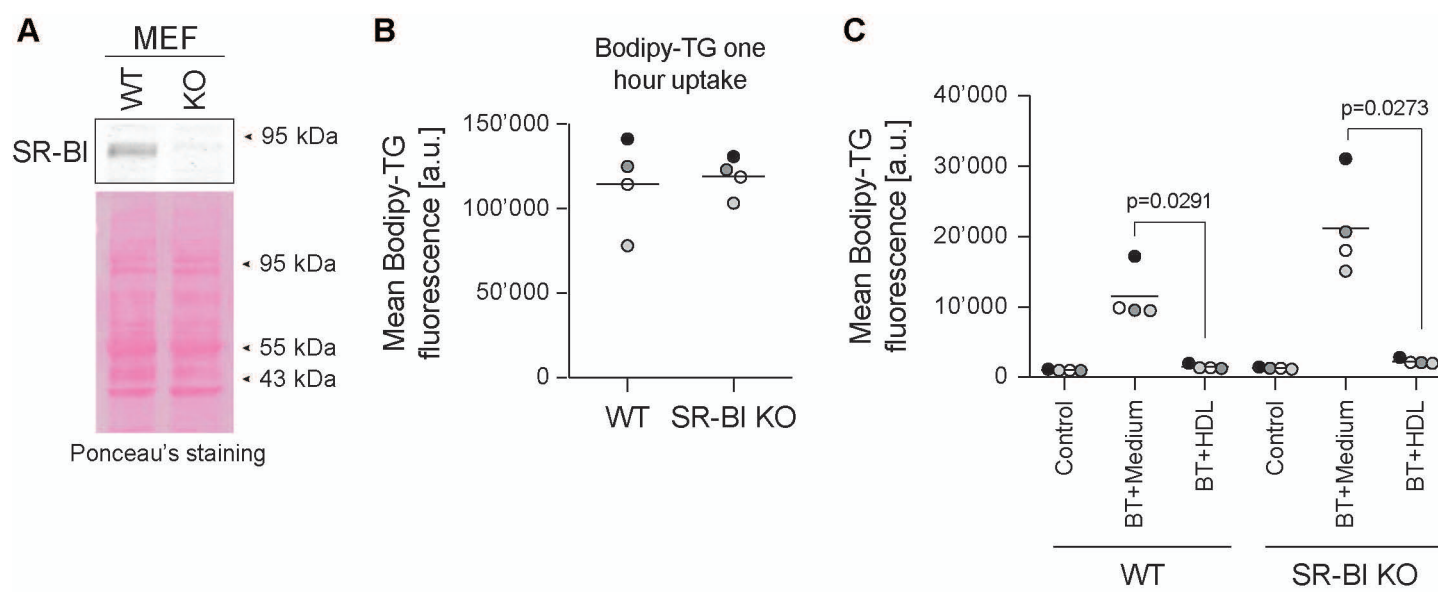

Figure S5

**Fig. S5. Role of SR-BI on BODIPY-TG efflux.**

**A.** SR-BI expression in wild-type (WT) and SR-BI knockout (KO) MEF cells. **B.** BODIPY-TG uptake in WT and SR-BI KO MEF cells. **C.** BODIPY-TG efflux in WT and SR-BI KO MEF cells.

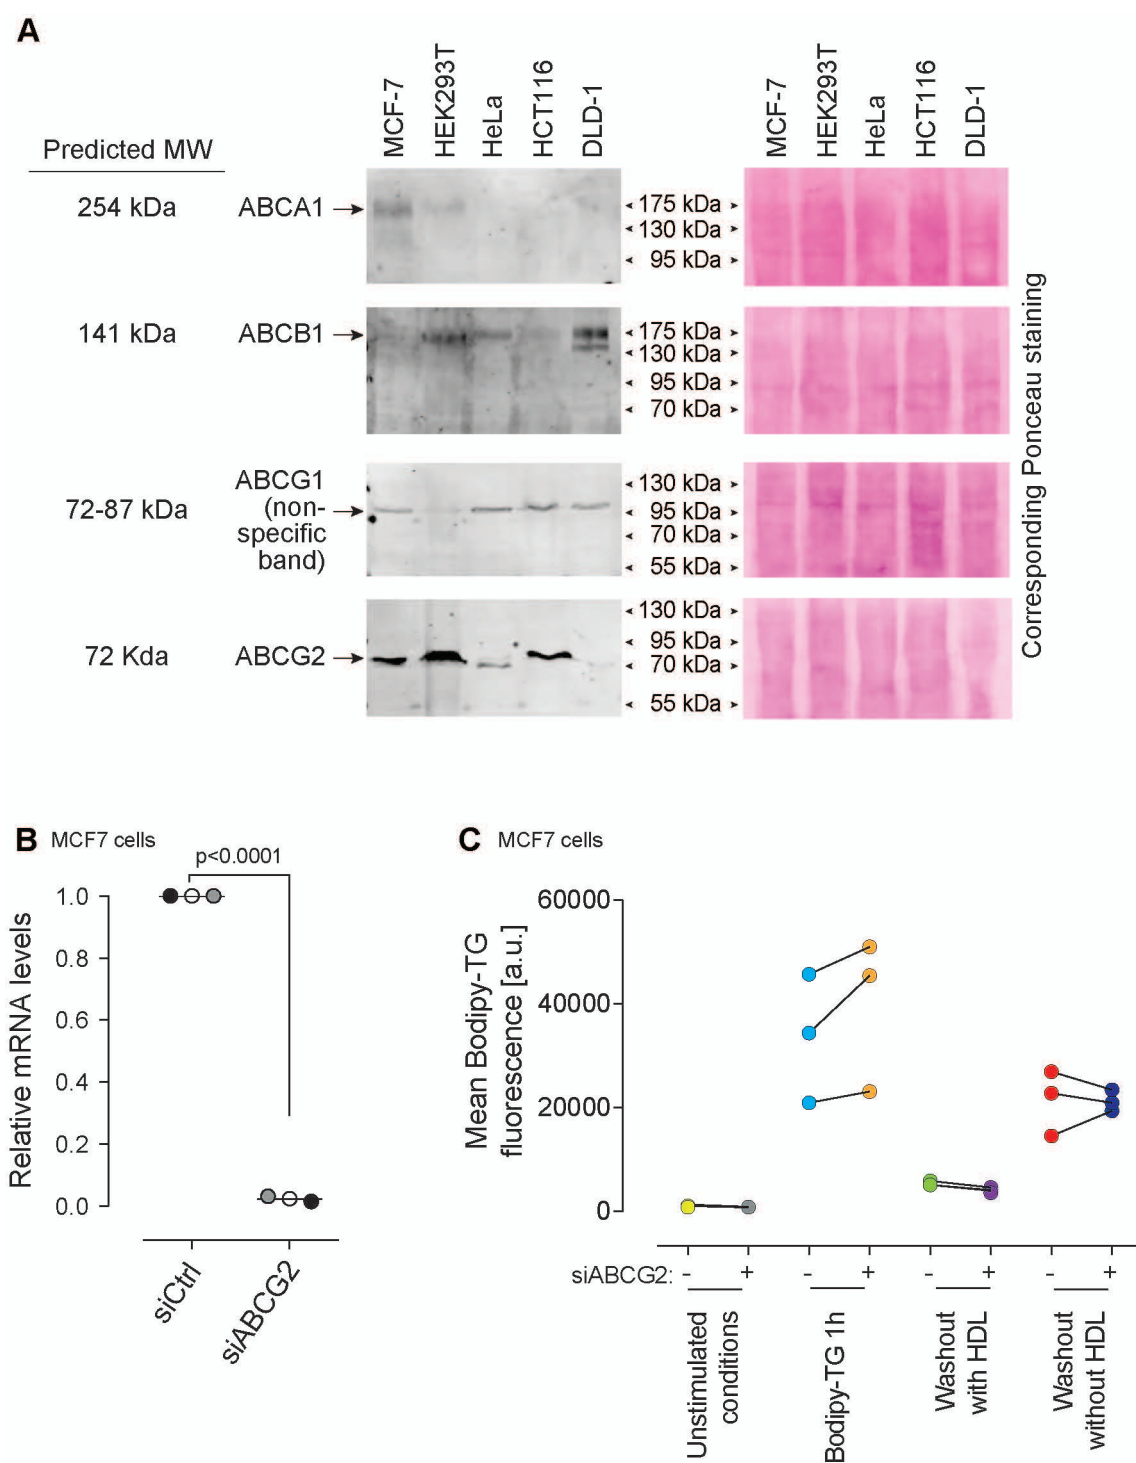

Figure S6

**Fig. S6. Role of ABCG2 on BODIPY-TG efflux in HEK293T cells.**

**A.** ABC transporter expression in the indicated cell lines was assessed by Western blotting. The indicated molecular weight (MW) were obtained from the Uniprot website. Note that the ABCG1 gene can give rise to 8 different isoforms. This explains the range of MW for this transporter. As reported in Figure S7, the anti-ABCG1 antibody was found to be not specific for this transporter. The indicated band corresponds therefore to a non-specific interaction. **B-C.** MCF7 cells (80000 per well) were plated in a 12-well plate. Then cells were transfected with a pool of siRNA directed at ABCG2 and analyzed 72 hours post-transfection. Knockdown efficiency was assessed at the mRNA level by RT-PCR (panel B). Alternatively, cells were treated as indicated in the scheme shown in Figure 8C. Cell-associated drug fluorescence was measured by flow cytometry. The graphs present the data derived from 3 independent experiments (panel C).

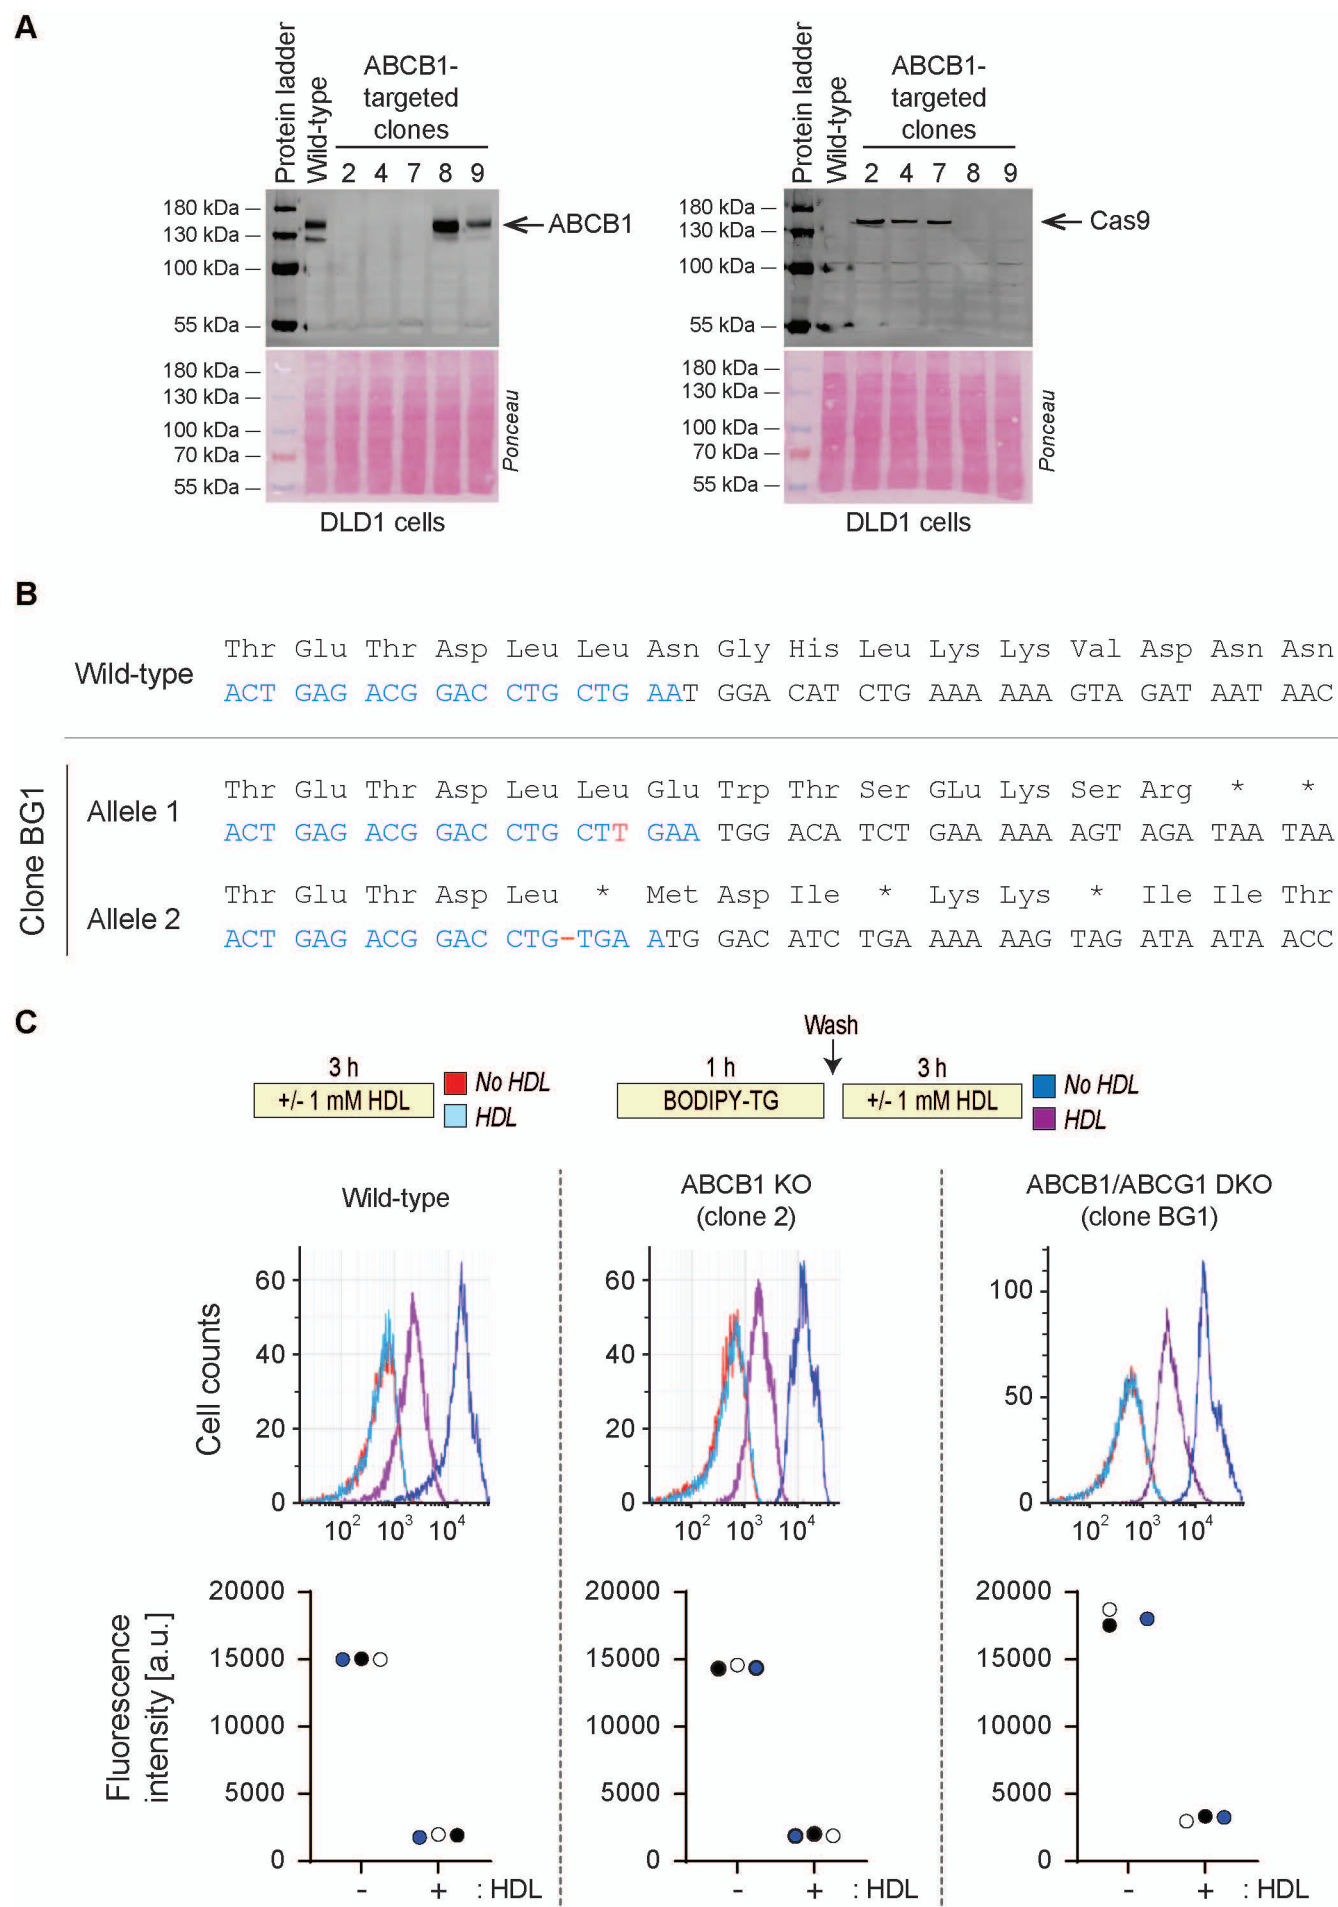

Figure S7

**Fig. S7. Role of ABC transporters on BODIPY-TG efflux in DLD1 cells.**

**A.** ABCB1 gene invalidation in DLD1 cells. The presence of ABCB1 and Cas9 in wild-type and CRISPR/Cas9 ABCB1-targeted clones was assessed by Western blotting. Loading evenness was evaluated by Ponceau staining. Note that the clones in which ABCB1 expression was abrogated were those that still expressed the Cas9 protein. **B.** CRISPR/Cas9-mediated ABCG1 gene disruption in the ABCB1 knock-out clone n°2, generating clone BG1. The sequence in blue corresponds to the sgRNA binding site in ABCG1 exon 2. The T nucleobase written in red is an insertion. The amino acids encoded by the codons are shown above the DNA sequences. The asterisks denote stop codons. The red dash indicates deletion of a cytosine nucleobase. **C.** The indicated cells (120000 per well) were plated in a 6-well plates. They were then treated as indicated in the scheme above the graphs. BODIPY-TG cell-associated fluorescence was assessed by flow cytometry (one representative experiment shown). The quantitation (mean of the cytometry distribution profiles) of 3 independent experiments (labelled with different symbols) are depicted below the flow cytometry profiles.

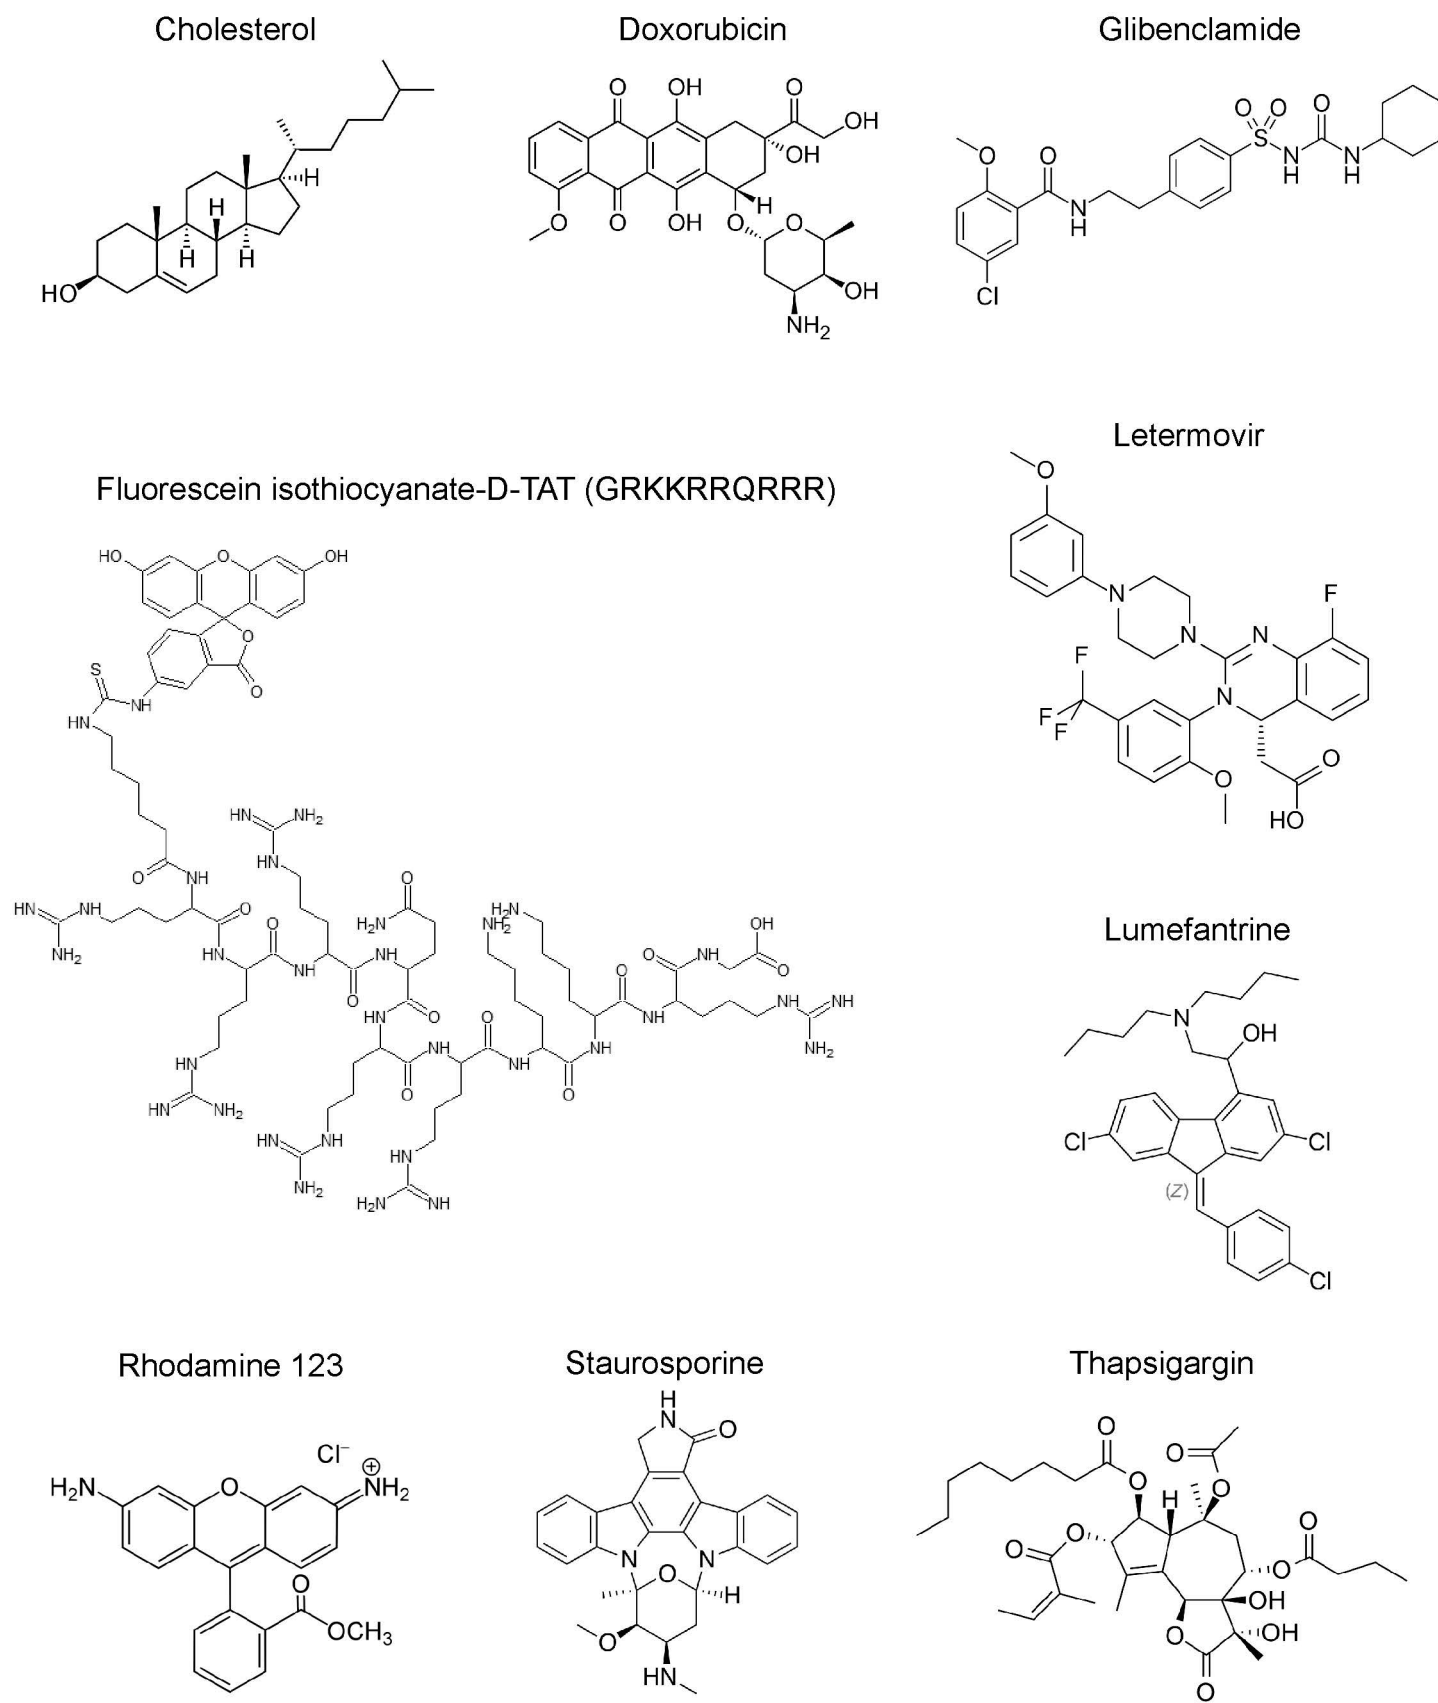

Figure S8

Fig. S8. Structures of the drugs used in this work.

**Table S1.** Antibodies used in this work

| Antigen or antibody type                       | Dilution | Incubation buffer       | Incubation temperature | Incubation time | Vendor            | Reference     | Lot number  |
|------------------------------------------------|----------|-------------------------|------------------------|-----------------|-------------------|---------------|-------------|
| BIP                                            | 1:1000   | TBS-tween 0.1%, 5% milk | 4°C                    | Overnight       | Cell Signaling    | 3183          | 6           |
| CHOP                                           | 1:500    | TBS-tween 0.1%, 5% milk | 4°C                    | 48 hours        | Cell Signaling    | 2895          | 13          |
| SERCA1                                         | 1:1000   | TBS-tween 0.1%, 5% milk | 4°C                    | Overnight       | Abcam             | Ab2819        | GR3278625-1 |
| SERCA2                                         | 1:1000   | TBS-tween 0.1%, 5% milk | 4°C                    | Overnight       | Cell Signaling    | 4388          | 2           |
| SERCA3                                         | 1:1000   | TBS-tween 0.1%, 5% milk | 4°C                    | Overnight       | Abnova            | H00000489-M01 | I951-2H3    |
| ABCA1                                          | 1:1000   | TBS-tween 0.1%, 5% milk | 4°C                    | Overnight       | Abcam             | Ab66217       | GR113106-1  |
| ABCB1                                          | 1:500    | TBS-tween 0.1%, 5% milk | 4°C                    | Overnight       | Abcam             | Ab170904      | GR32192362  |
| ABCG1                                          | 1:1000   | TBS-tween 0.1%, 5% milk | 4°C                    | Overnight       | Abcam             | Ab52617       | GR3255111-4 |
| ABCG2                                          | 1:1000   | TBS-tween 0.1%, 5% milk | 4°C                    | Overnight       | Abcam             | Ab207732      | GR3232144-1 |
| SR-BI                                          | 1:500    | TBS-tween 0.1%, 5% milk | 4°C                    | Overnight       | Novus Biologicals | NB400-104SS   | O           |
| Alexa Fluor 680 goat anti-rabbit antibody      | 1:5000   | TBS-tween 0.1%, 5% milk | Room temperature       | 1 hour          | ThermoFisher      | A21109        | 1816534     |
| Alexa Fluor plus 800 goat anti-rabbit antibody | 1:5000   | TBS-tween 0.1%, 5% milk | Room temperature       | 1 hour          | ThermoFisher      | A32735        | RJ243469    |
| Alexa Fluor 680 goat anti-mouse antibody       | 1:5000   | TBS-tween 0.1%, 5% milk | Room temperature       | 1 hour          | ThermoFisher      | A21057        | 1752100     |
| Alexa Fluor 680 goat anti-rat antibody         | 1:5000   | TBS-tween 0.1%, 5% milk | Room temperature       | 1 hour          | ThermoFisher      | A21096        | 1718849     |



**Table S2.** Primers used for RT-PCR-based detection of the indicated proteins (h, human).

| Target   | Direction | Number | Sequence                       | Description                                                                            | NCBI entry     |
|----------|-----------|--------|--------------------------------|----------------------------------------------------------------------------------------|----------------|
| h-SERCA2 | Forward   | 1612   | ATG GGG CTC CAA CGA GTT AC     | nucleotides 648-667 of human SERCA2, variant a; identical sequence in human variant b  | NM_001681.4    |
| h-SERCA2 | Reverse   | 1613   | TTT CCT GCC ATA CAC CCA CAA    | nucleotides 851-871 of human SERCA2, variant a                                         | NM_001681.4    |
| h-BIP    | Forward   | 1617   | GAA AGA AGG TTA CCC ATG CAG T  | nucleotides 702-723 of human BIP                                                       | NM_005347.5    |
| h-BIP    | Reverse   | 1618   | CAG GCC ATA AGC AAT AGC AGC    | nucleotides 830-850 of human BIP                                                       | NM_005347.5    |
| h-XBP1s  | Forward   | 1619   | TGC TGA GTC CGC AGC AGG TG     | nucleotides 528-547 of human XBP1,variant 2                                            | NM_001079539.2 |
| h-XBP1s  | Reverse   | 1620   | GCT GGC AGG CTC TGG GGA AG     | nucleotides 677-696 of human XBP1,variant 2                                            | NM_001079539.2 |
| h-CHOP   | Forward   | 1621   | GGA AAC AGA GTG GTC ATT CCC    | nucleotides 491-511 of human CHOP, variant 5; identical sequence in variants 1-4 and 6 | NM_004083.6    |
| h-CHOP   | Reverse   | 1622   | CTG CTT GAG CCG TTC ATT CTC    | nucleotides 586-606 of human CHOP, variant 5; identical sequence in variants 1-4 and 6 | NM_004083.6    |
| h-ABCB1  | Forward   | 1602   | TTG CTG CTT ACA TTC AGG TTT CA | nucleotides 897-919 of human ABCB1,variant 1; identical sequence in variants 2-4       | NM_001348945.2 |
| h-ABCB1  | Reverse   | 1603   | AGC CTA TCT CCT GTC GCA TTA    | nucleotides 981-1001 of human ABCB1,variant 1; identical sequence in variants 2-4      | NM_001348945.2 |
| h-GAPDH  | Forward   | 1578   | CTG ACT TCA ACA GCG ACA CC     | nucleotides 873-892 of human GAPDH,variant 7; identical sequence in variants 1-4       | NM_001357943.2 |
| h-GAPDH  | Reverse   | 1579   | TGC TGT AGC CAA ATT CGT TG     | nucleotides 967-986 of human GAPDH, variant 7; identical sequence in variants 1-4      | NM_001357943.2 |
| h-ABCG2  | Forward   | 1606   | CAG GTG GAG GCA AAT CTT CGT    | nucleotides 350-370 of human ABCG2, variant 7;                                         | NM_001348989.2 |
|          |           |        |                                | identical sequence in variants 1-6                                                     |                |
| h-ABCG2  | Reverse   | 1607   | ACC CTG TTA ATC CGT TCG TTT T  | nucleotides 575-596 of human ABCG2, variant 7; identical sequence in variants 1-6      | NM_001348989.2 |
